# Supplementary material
Source: PubMed Central journal article supplement (PMC6612659)
Supplement: mmc1.pdf [file mmc1.pdf]

## **Supplemental Information**

### **mRNA Therapy Improves Metabolic and Behavioral Abnormalities in a Murine Model of Citrin Deficiency**

**Jingsong Cao, Ding An, Mikel Galduroz, Jenny Zhuo, Shi Liang, Marianne Eybye, Andrea Frassetto, Eishi Kuroda, Aki Funahashi, Jordan Santana, Cosmin Mihai, Kerry E. Benenato, E. Sathyajith Kumarasinghe, Staci Sabnis, Timothy Salerno, Kimberly Coughlan, Edward J. Miracco, Becca Levy, Gilles Besin, Joshua Schultz, Christine Lukacs, Lin Guey, Patrick Finn, Tatsuhiko Furukawa, Paloma H. Giangrande, Takeyori Saheki, and Paolo G.V. Martini**

## SUPPLEMENTARY FIGURES

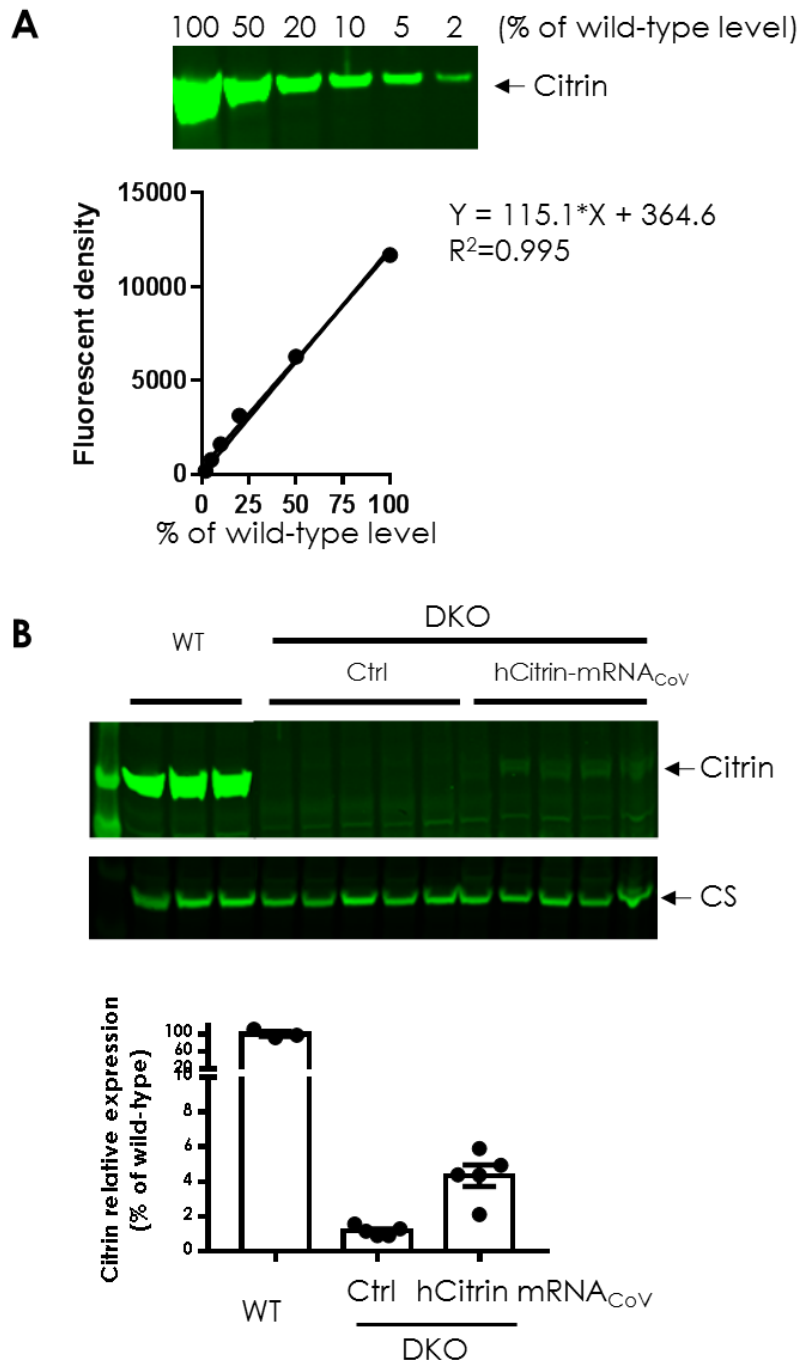

**Supplementary Fig. 1. hCitrin protein levels in citrin deficient mice (*Cttn*<sup>-/-</sup>).** **A)** Immunoblot of increasing amounts of citrin protein from wild-type mouse liver mitochondrial extracts for generating citrin protein standard curve. The quantitative fluorescent signals from the citrin bands were plotted against the percentage of citrin protein expression level in wild-type mice,

showing a wide range of linearity. **B)** Citrin protein expression levels in citrin deficient mice (*Ctrn*<sup>-/-</sup>) after repeat injections of hCitrin-mRNA. *Ctrn/mGPD*-dKO mice received three weekly injections (*i.v.*) of either control (Ctrl) or hCitrin-mRNA<sub>CoV</sub> at 0.5 mg/kg. Mice were euthanized at 24 hr after the third and final injection. Citrin protein expression levels in mitochondria prepared from mouse livers were assessed by Western blot analysis, normalized to Citrate Synthase (CS), a mitochondrial marker, and expressed as percentage of the average of wild-type group. The average hCitrin protein expression level introduced to the *Ctrn/mGPD*-dKO was 4.3% of wild-type level in mice. Citrin and CS protein expression levels were quantified using the Odyssey CLx instrument and accompanying software. WT, wild-type mice. Bars represent mean  $\pm$  SEM (n = 3 – 5).



**Supplementary Table 2.** Complete mRNA sequence of eGFP. U = N1m-pseudouridine. UTR sequences are underlined.

```
GGGAAAUAAGAGAGAAAAGAAGAGUAAGAAGAAUAUAAGAGCCACCAUGGUGUCCAAGGGUG  
AGGAAUUGUUUACCGGGGUGGUGCCUAUUCUCGUCGAACUUGACGGGGGAUGUGAAUGGACAC  
AAGUUUUCGGUAUCCGGAGAAGGAGAGGGUGACGCCACAUACGGAAAGCUUACACUCAAUUC  
AUCUGUACGACGGGGAAACUGCCCGUACCCUGGCCUACGCUCGUAACCACGCUGACUUAUGGAG  
UGCAGUGCUUUAGCAGAUACCCCGACCAUAUGAAGCAGCACGACUUCUUCAAGUCGGCGAUGCC  
CGAGGGGUACGUGCAAGAGAGGACCAUUUUCUUAAGACGAUGGCAAUUAACAAAACACGCGCA  
GAAGUCAAGUUUGAGGGCGAUACUCUGGUCAAUCGGAUCGAAUUGAAGGGAAUCGAUUUCAA  
GAAGAUGGAAACAUCUUGGCCAUAGCUCGAGUACAACUAUAACUCGCAUAAUGUCUAUAUCA  
UGGCUGACAAGCAGAAAAACGGUAUCAAGUCAACUUAAGAUCGACACAUAUUGAGGACGG  
UUCGGUGCAGCUUGCGGACCACUAUCAACAGAAUACGCCGAUUGGGGAUGGUCCGGUCCUUUU  
GCCGGAUAACCAUUAUCUCUCAACCCAGUCAGCCUUGAGCAAAGAUCCAACGAGAAGAGGGACC  
ACAUGGUCUUGCUCGAAUUCGUGACAGCGGCAGGGAUACUCUGGGAAUGGACGAGUUGUACA  
AGUGAUAUAAGGCUGGAGCCUCGGUGGCCAUGCUCUUGCCCCUUGGGCCUCCCCCAGCCCU  
CCUCCCCUCCUGCACCCGUACCCCGUGGUUCUUGAAUAAAGUCUGAGUGGGCGGCAAAAAA  
AAAAAAAAAAAAAAAAAAAAAAAAAAAAAAAAAAAAAAAAAAAAAAAAAAAAAAAAAAAAAAAAA  
AAAAAAAAAAAAAAAAAAAAAAAAAAAAAAAAAAAAUCUAG
```
